# Supplementary material
Source: PubMed Central journal article supplement (PMC9250625)

THCA

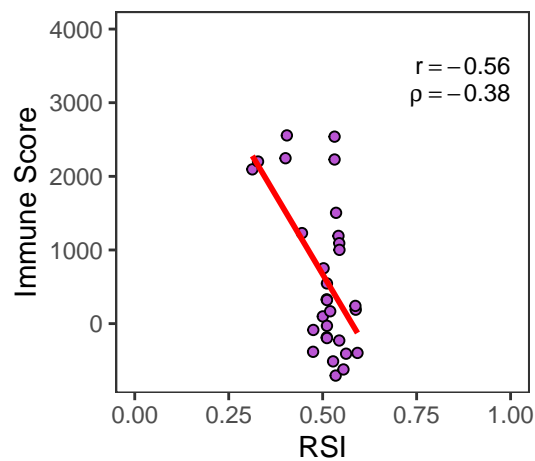

CESC

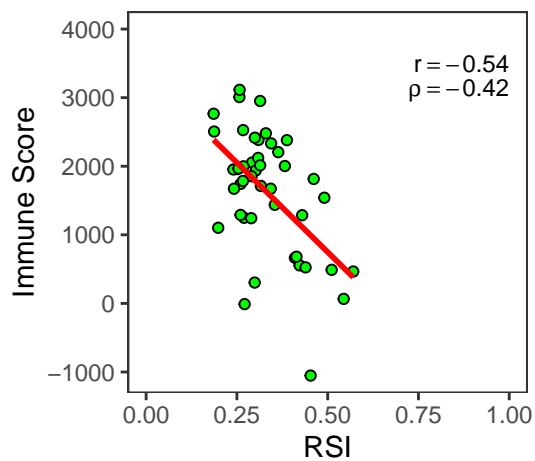

NMSC

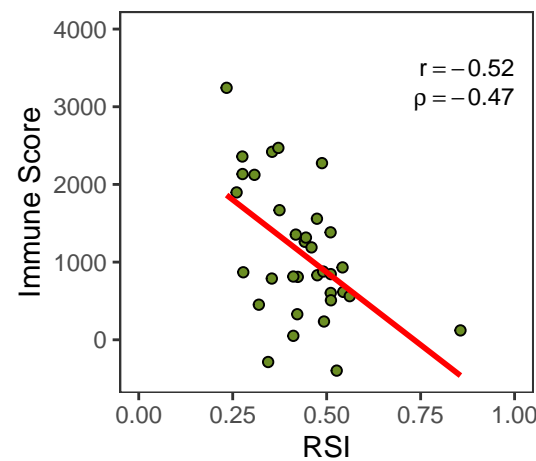

MELA

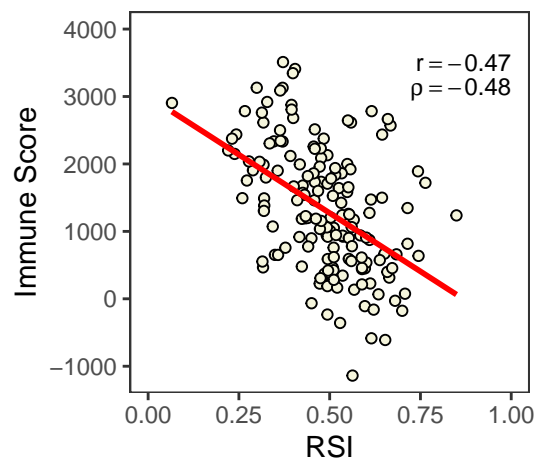

HNSC

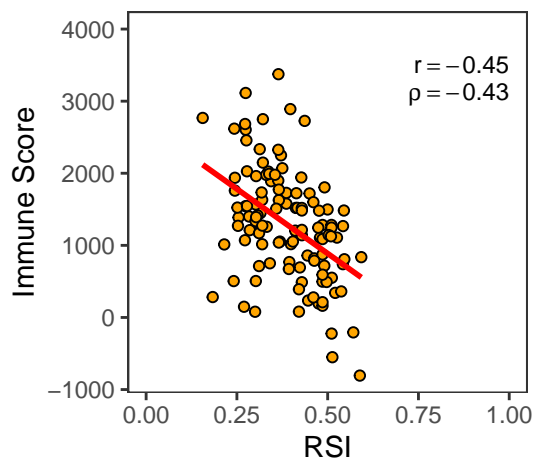

LU\_NOS

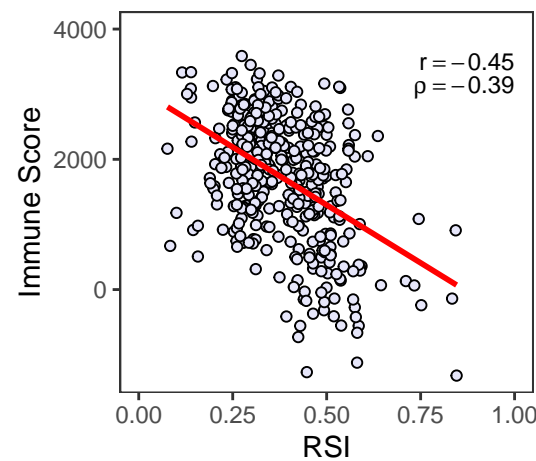

BC\_BASAL

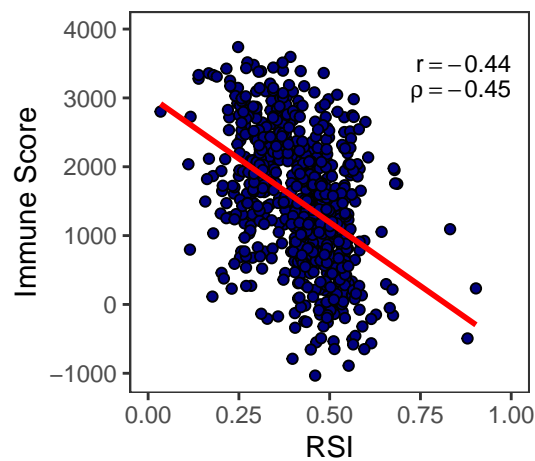

LGG

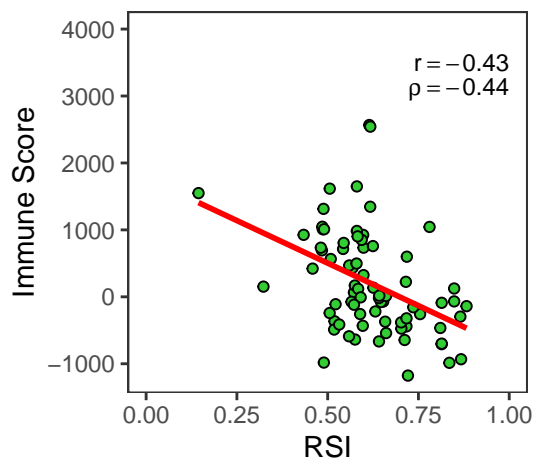

HGG

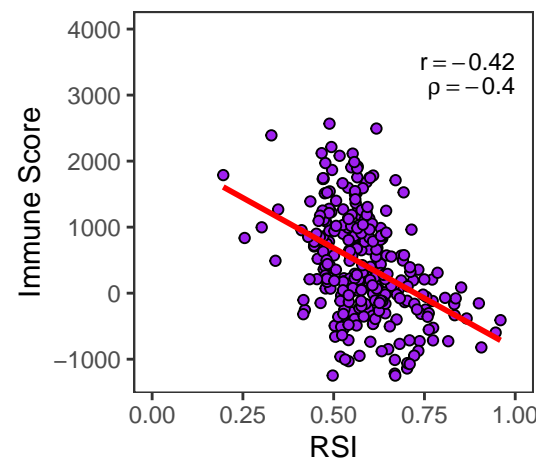

LUAD

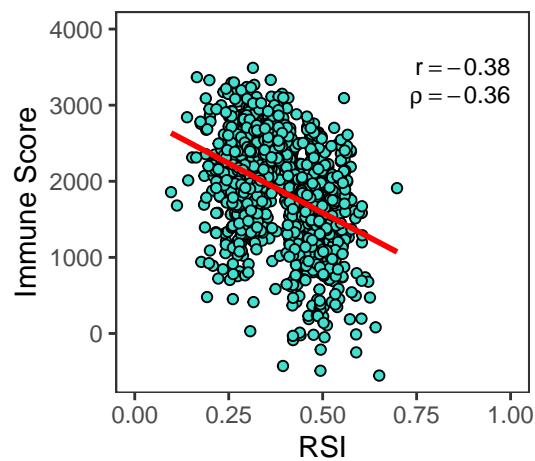

BC\_HER2

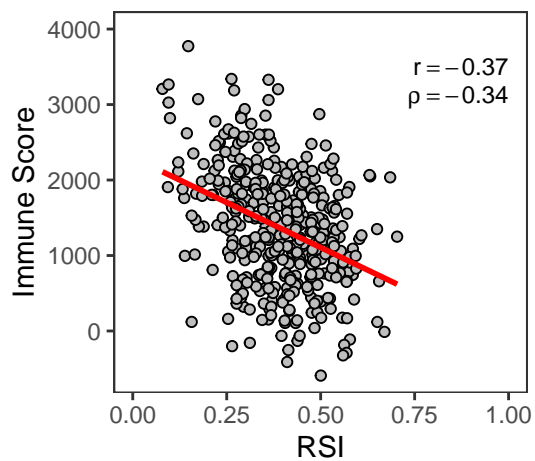

UCEC

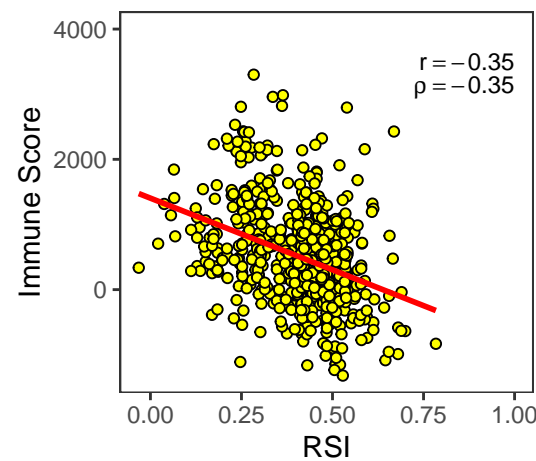

KIR

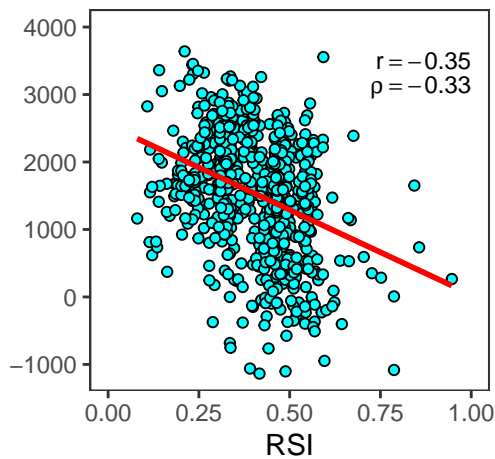

NE\_LUNG

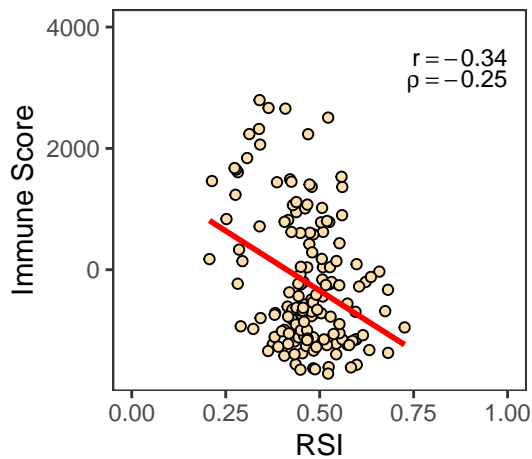

NE\_PANC

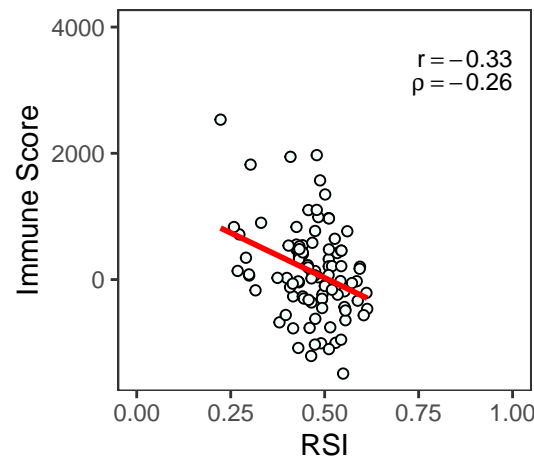

OVCA

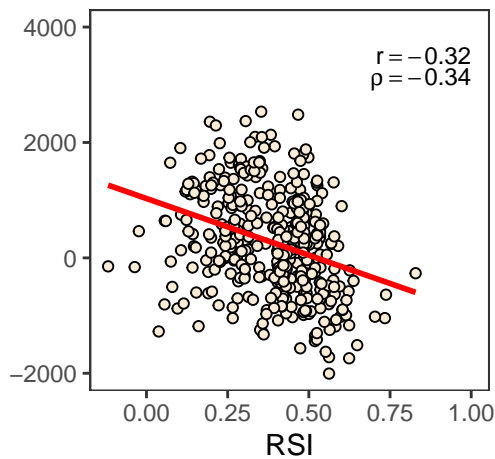

NE

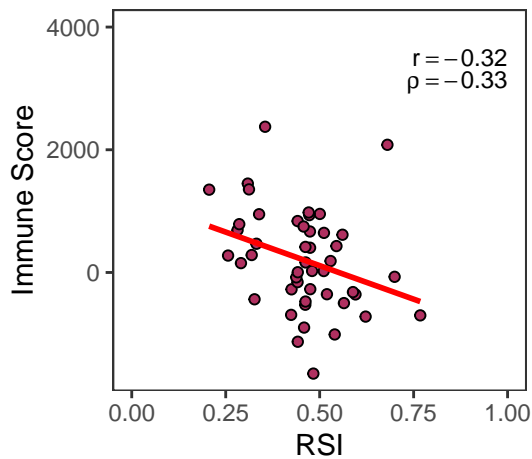

STAD

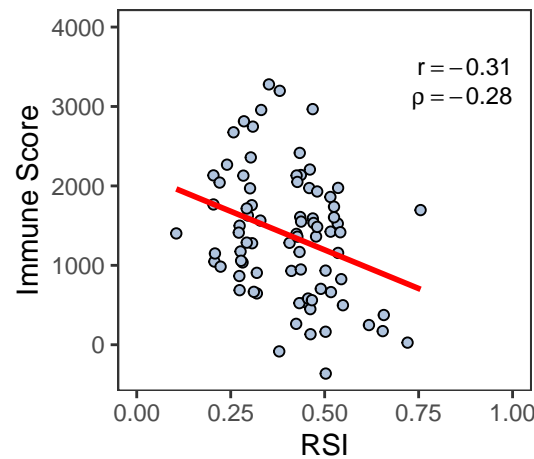

SARC

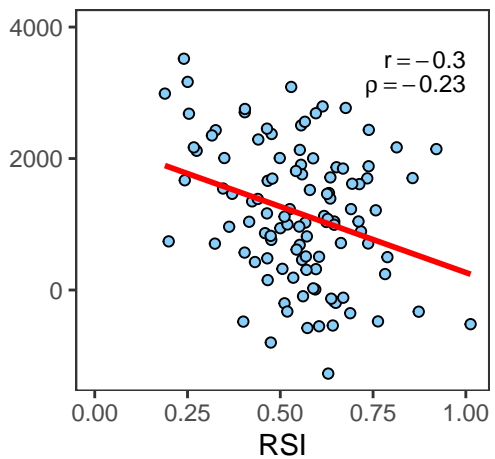

LUSC

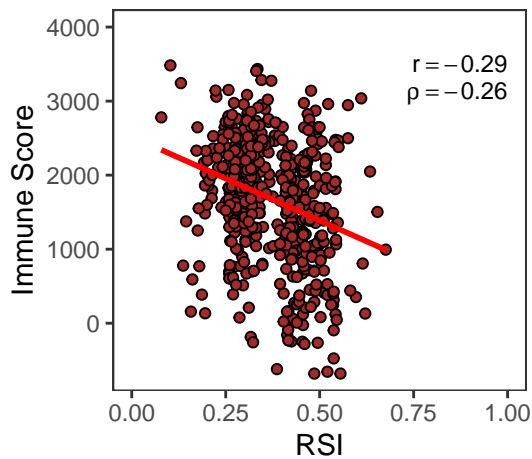

BC\_LUMB

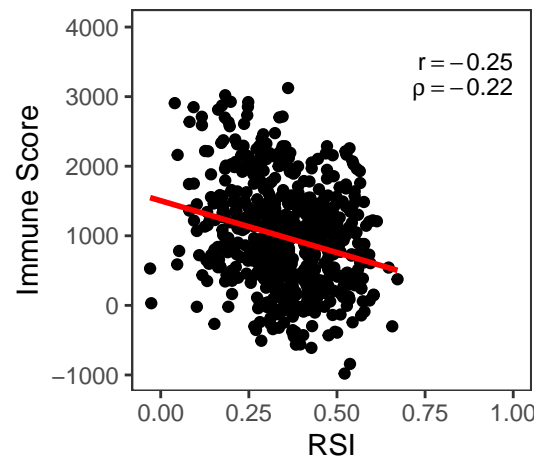

COLON

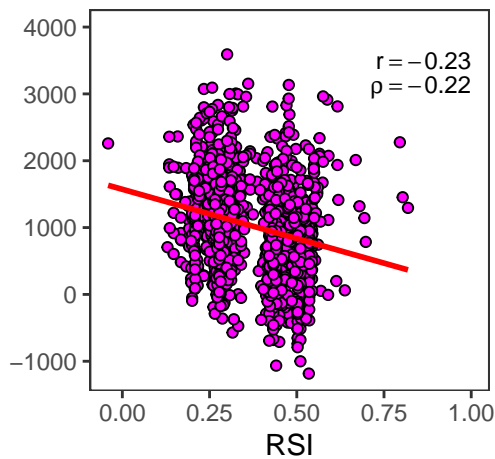

PRAD

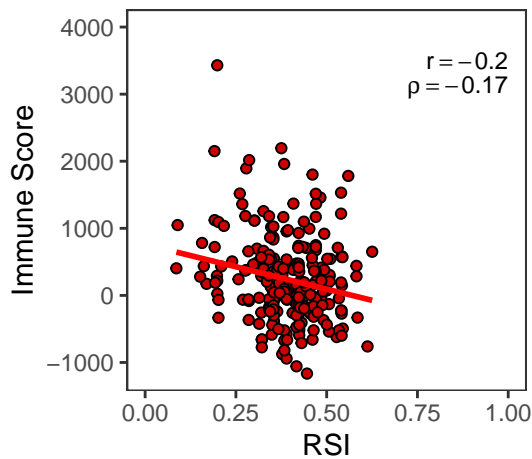

LIVC

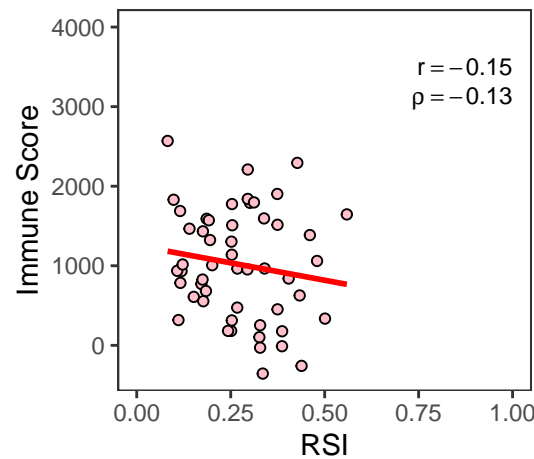

READ\_AN

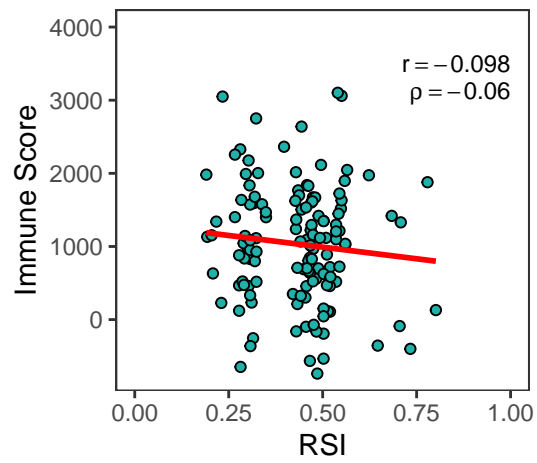

PANC

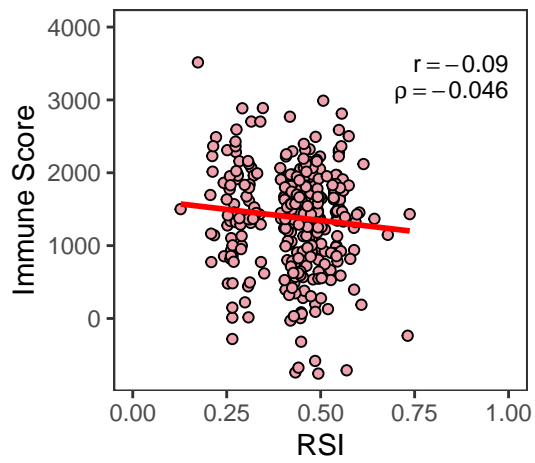

KIR\_PEL

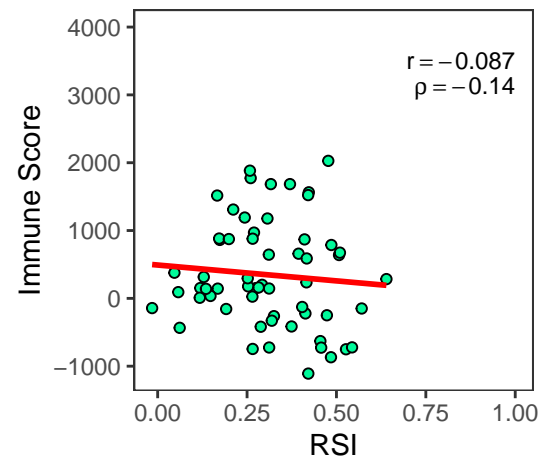

ESCA

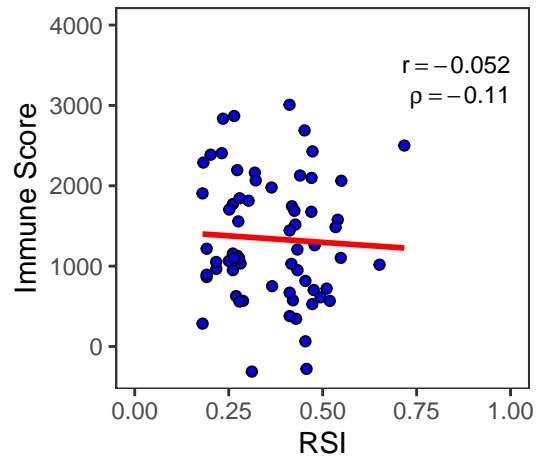

BC\_LUMA

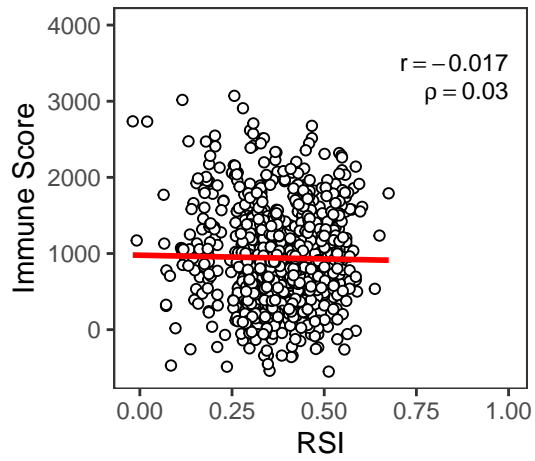

BC\_NORM

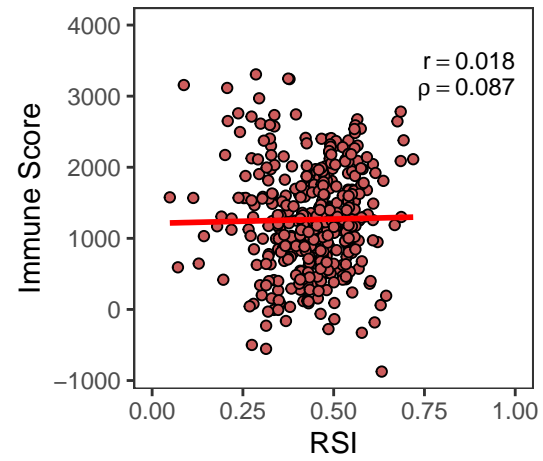

BLCA

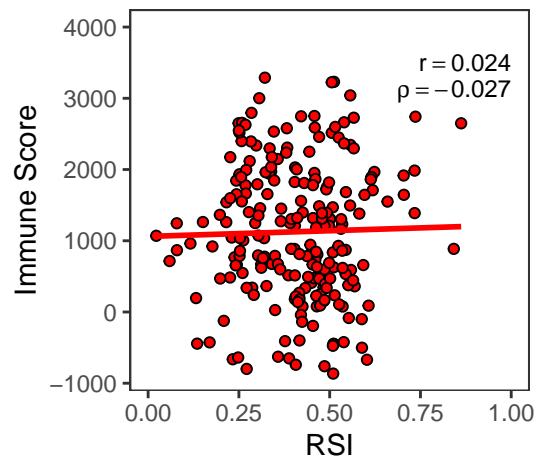

Supplement: NIHMS1800929-supplement-1.pdf [file NIHMS1800929-supplement-1.pdf]
