# Supplementary material
Source: PubMed Central journal article supplement (PMC9250625)

RSI LO HI

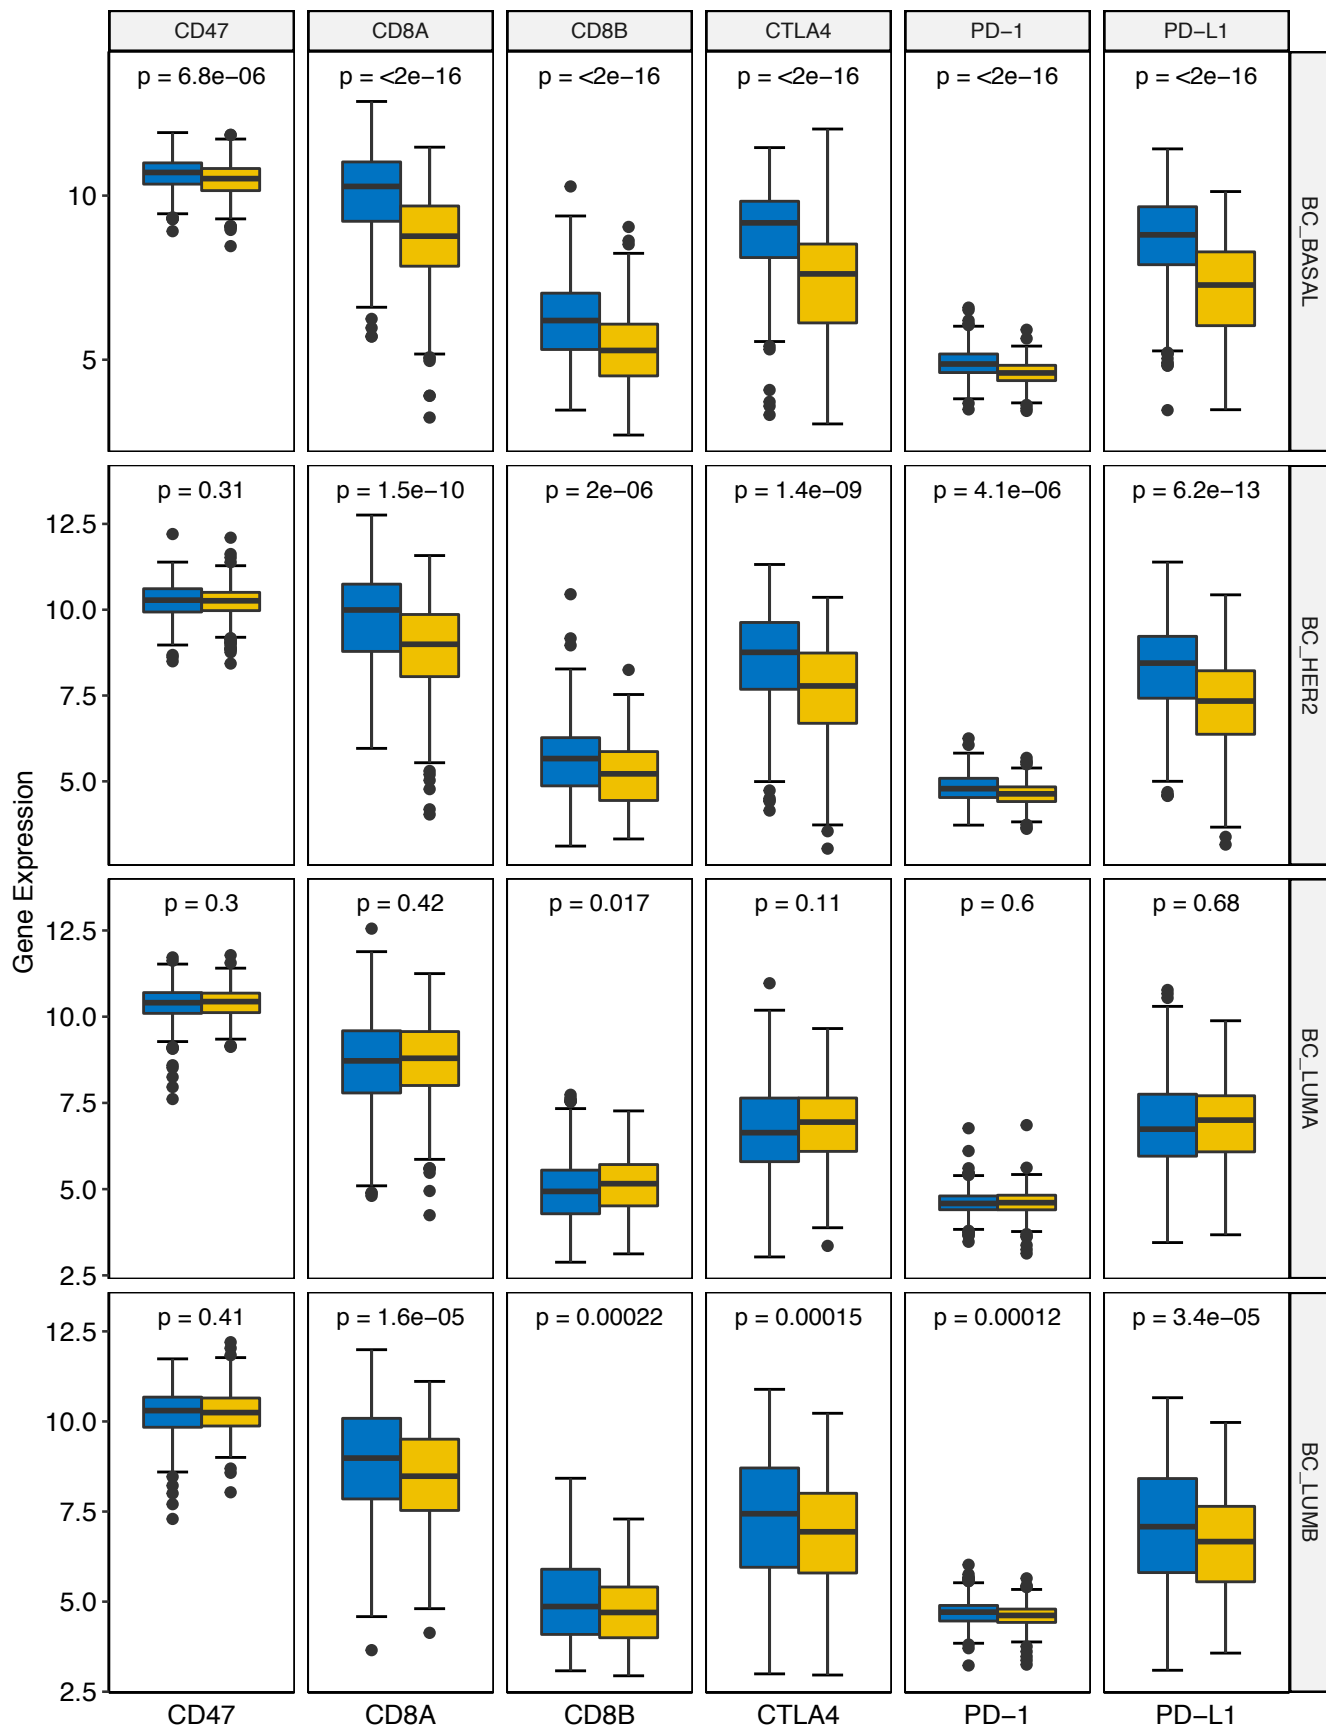

**Supplemental Figure 2**

RSI LO HI

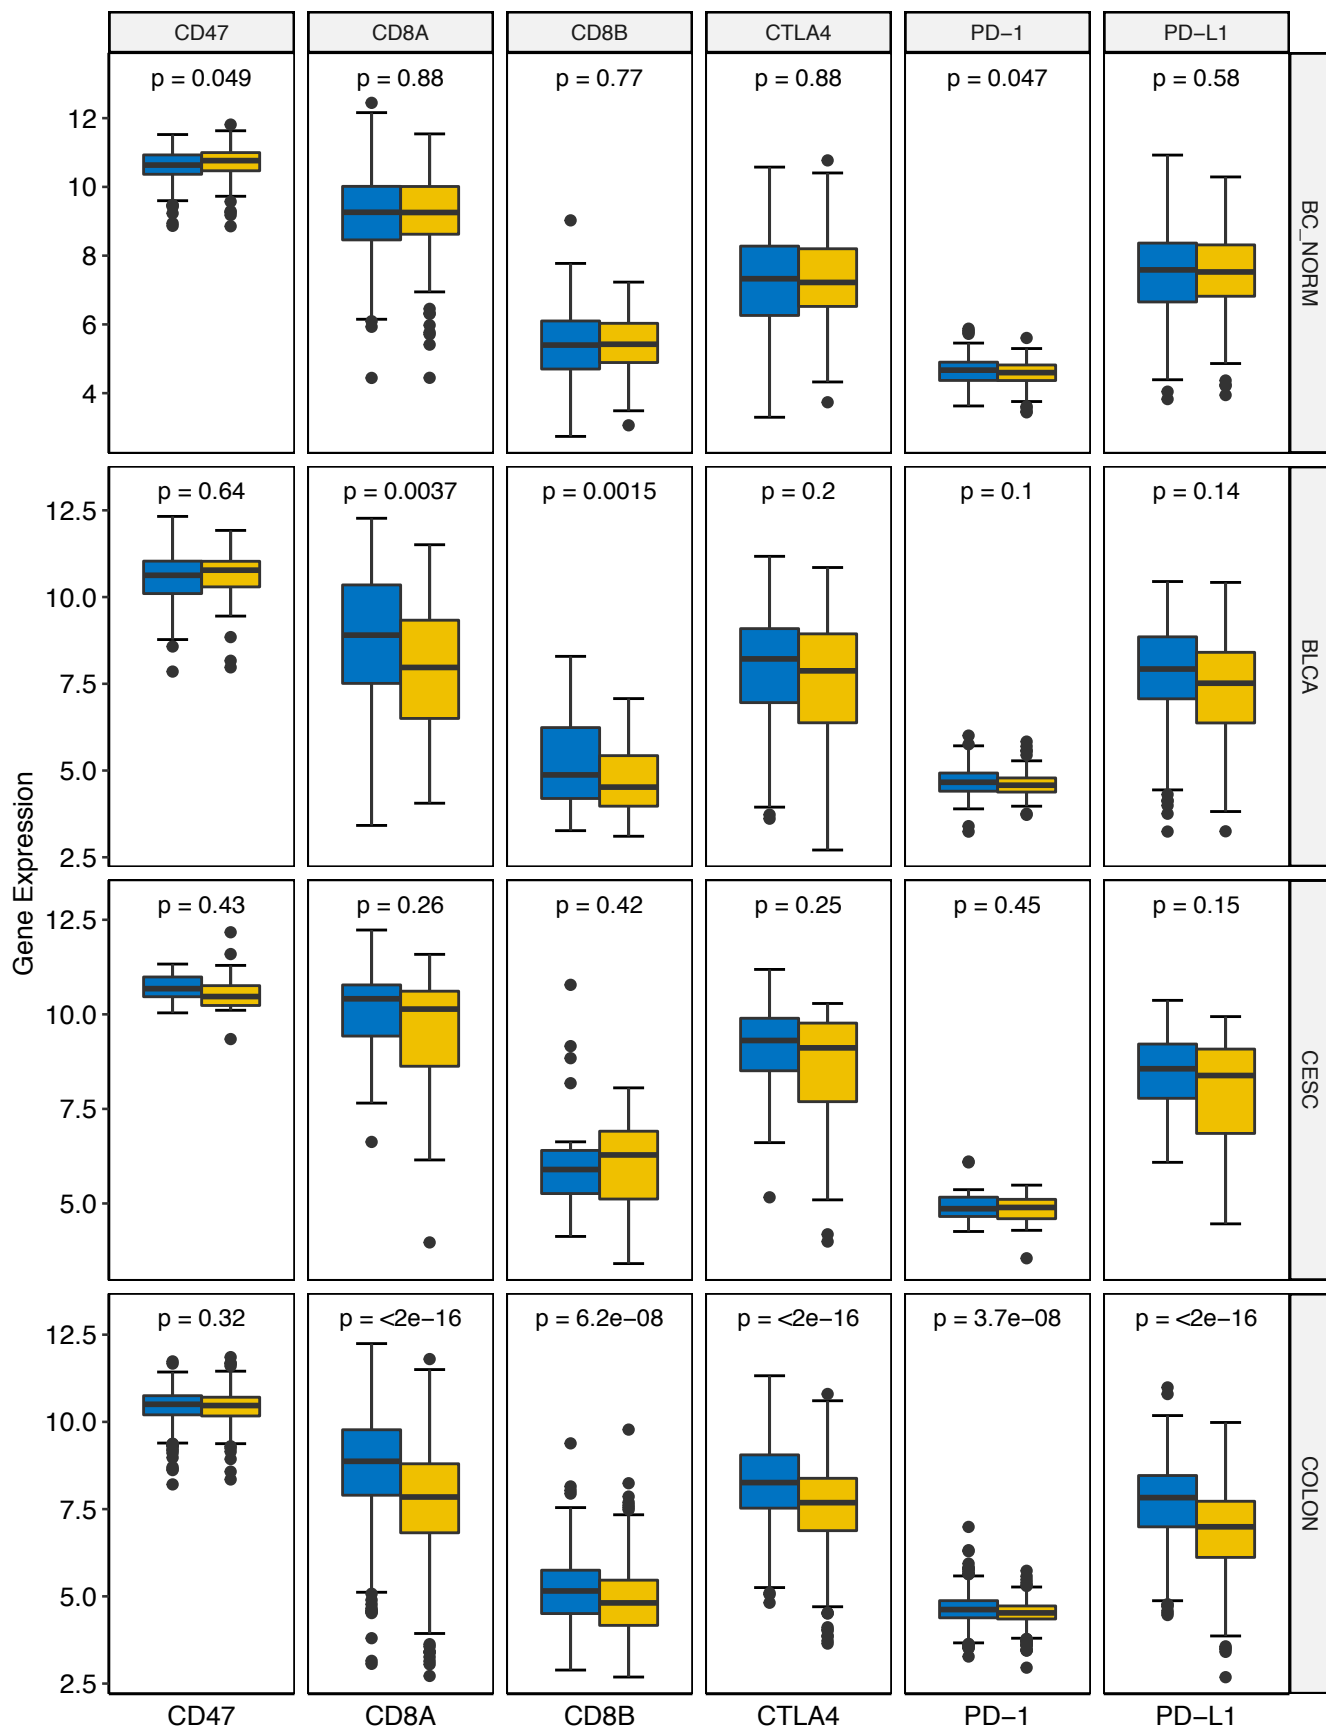

RSI LO HI

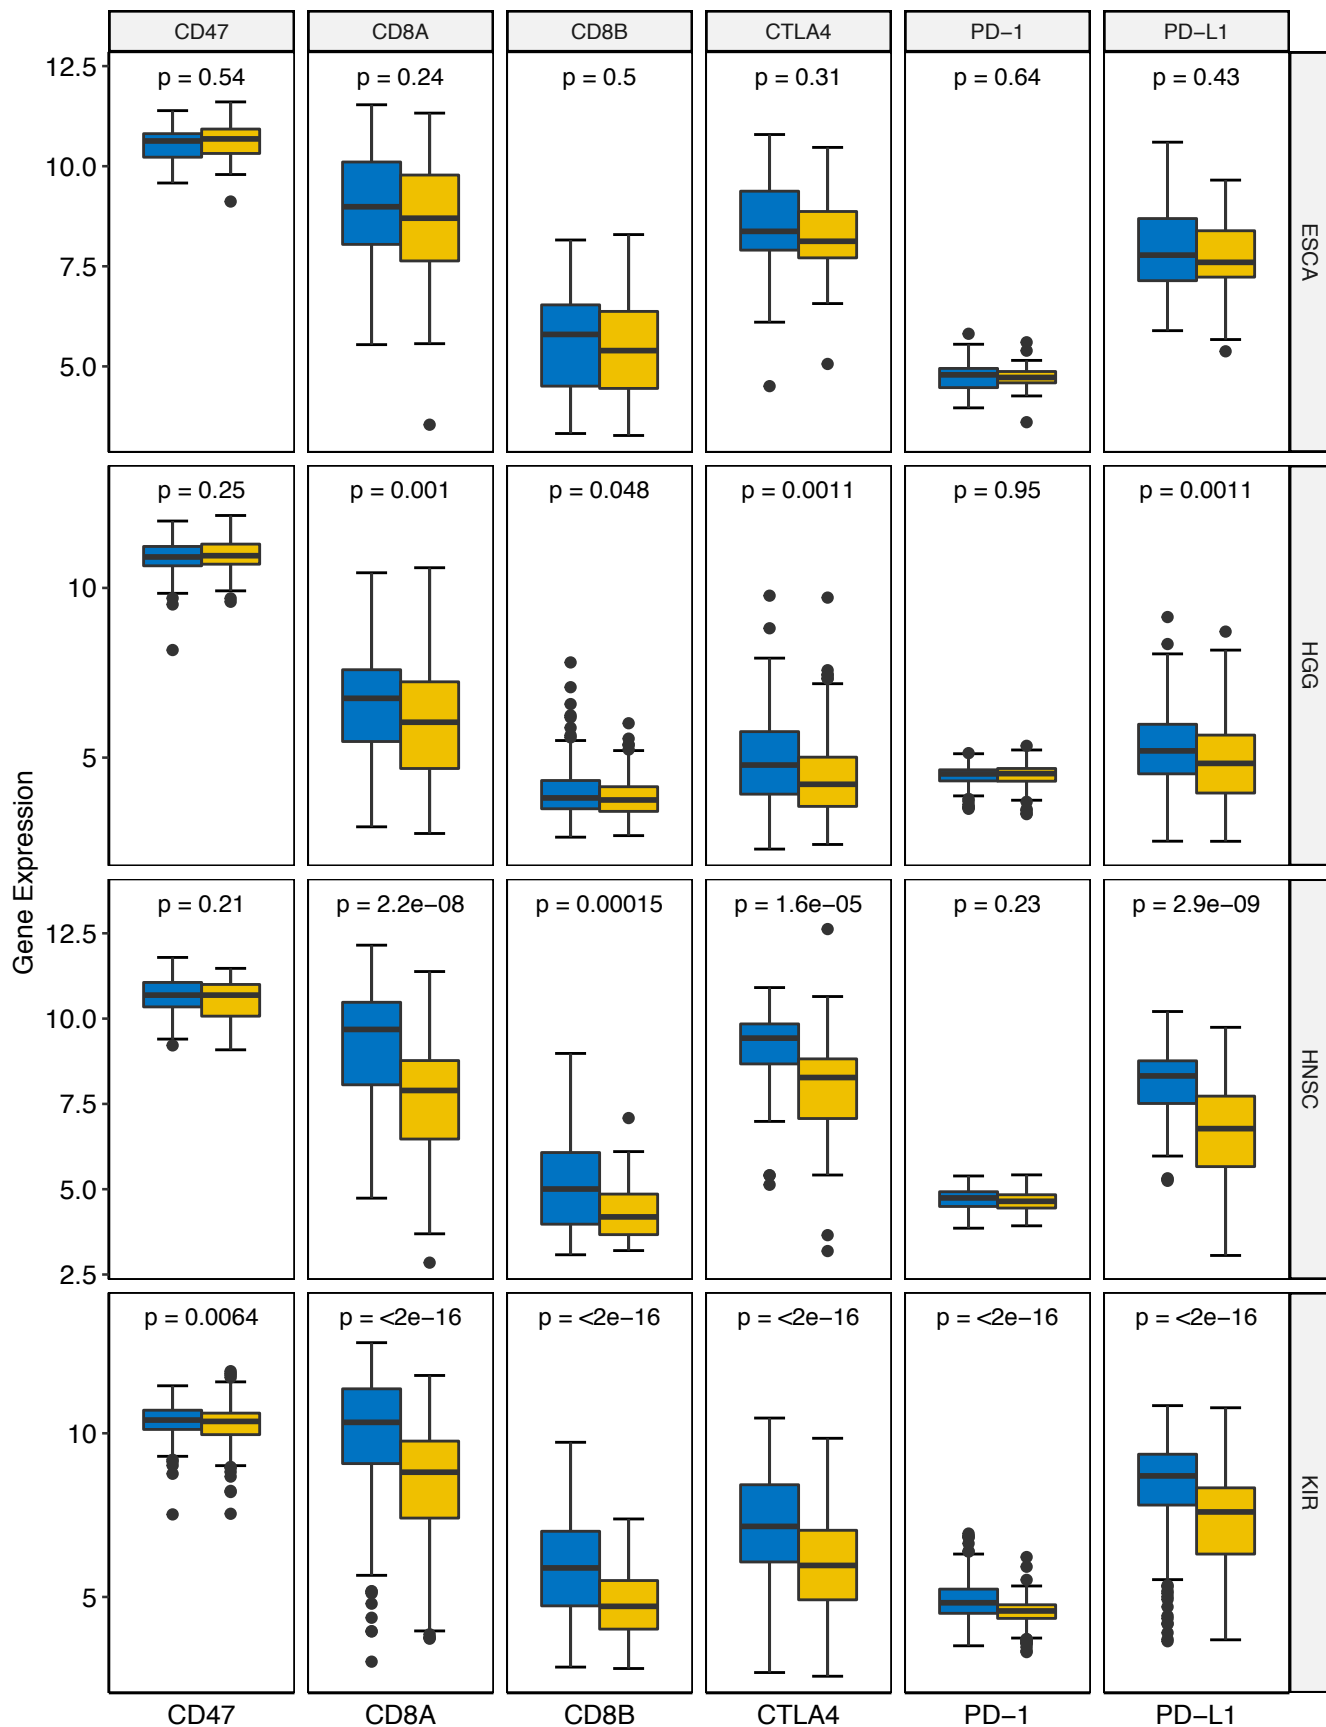

RSI LO HI

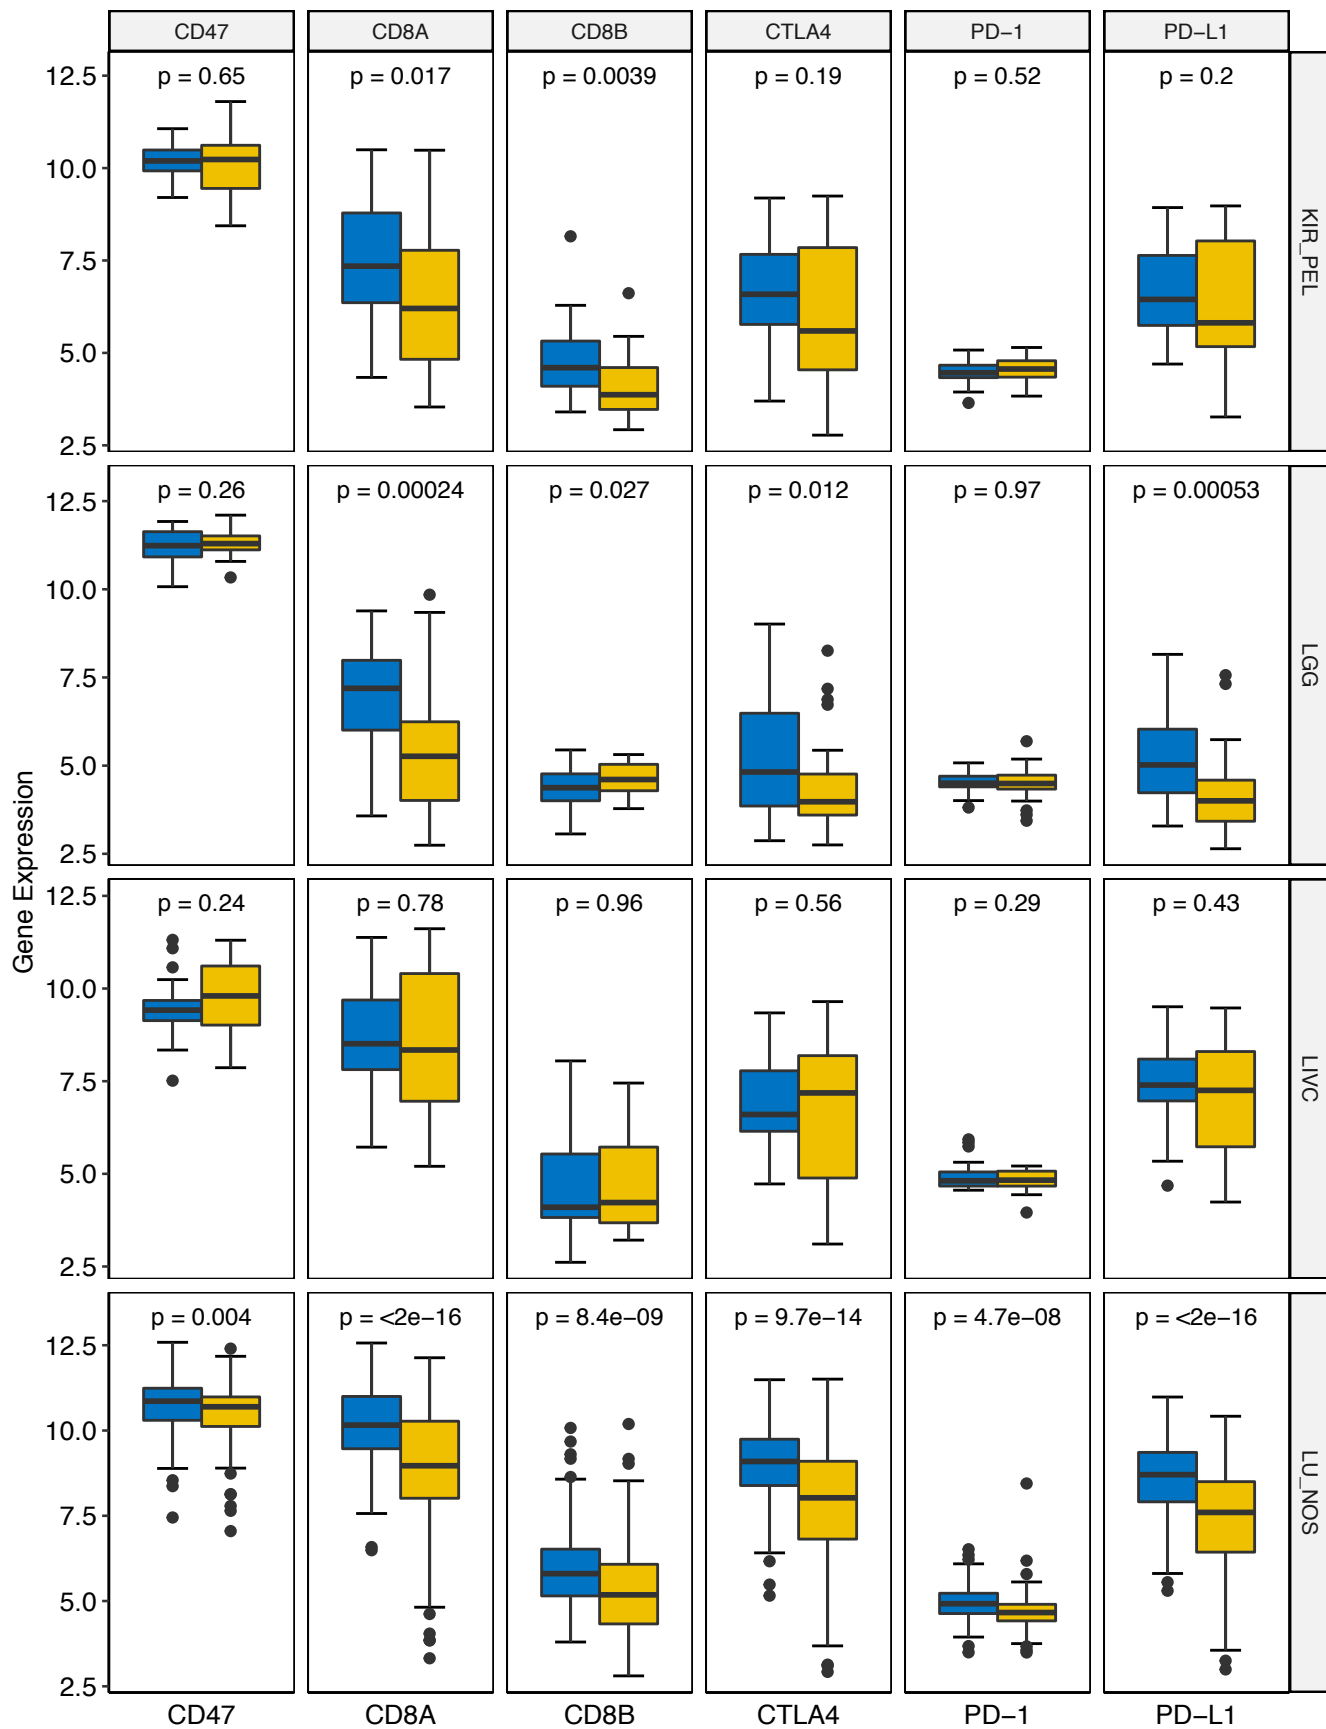

RSI LO HI

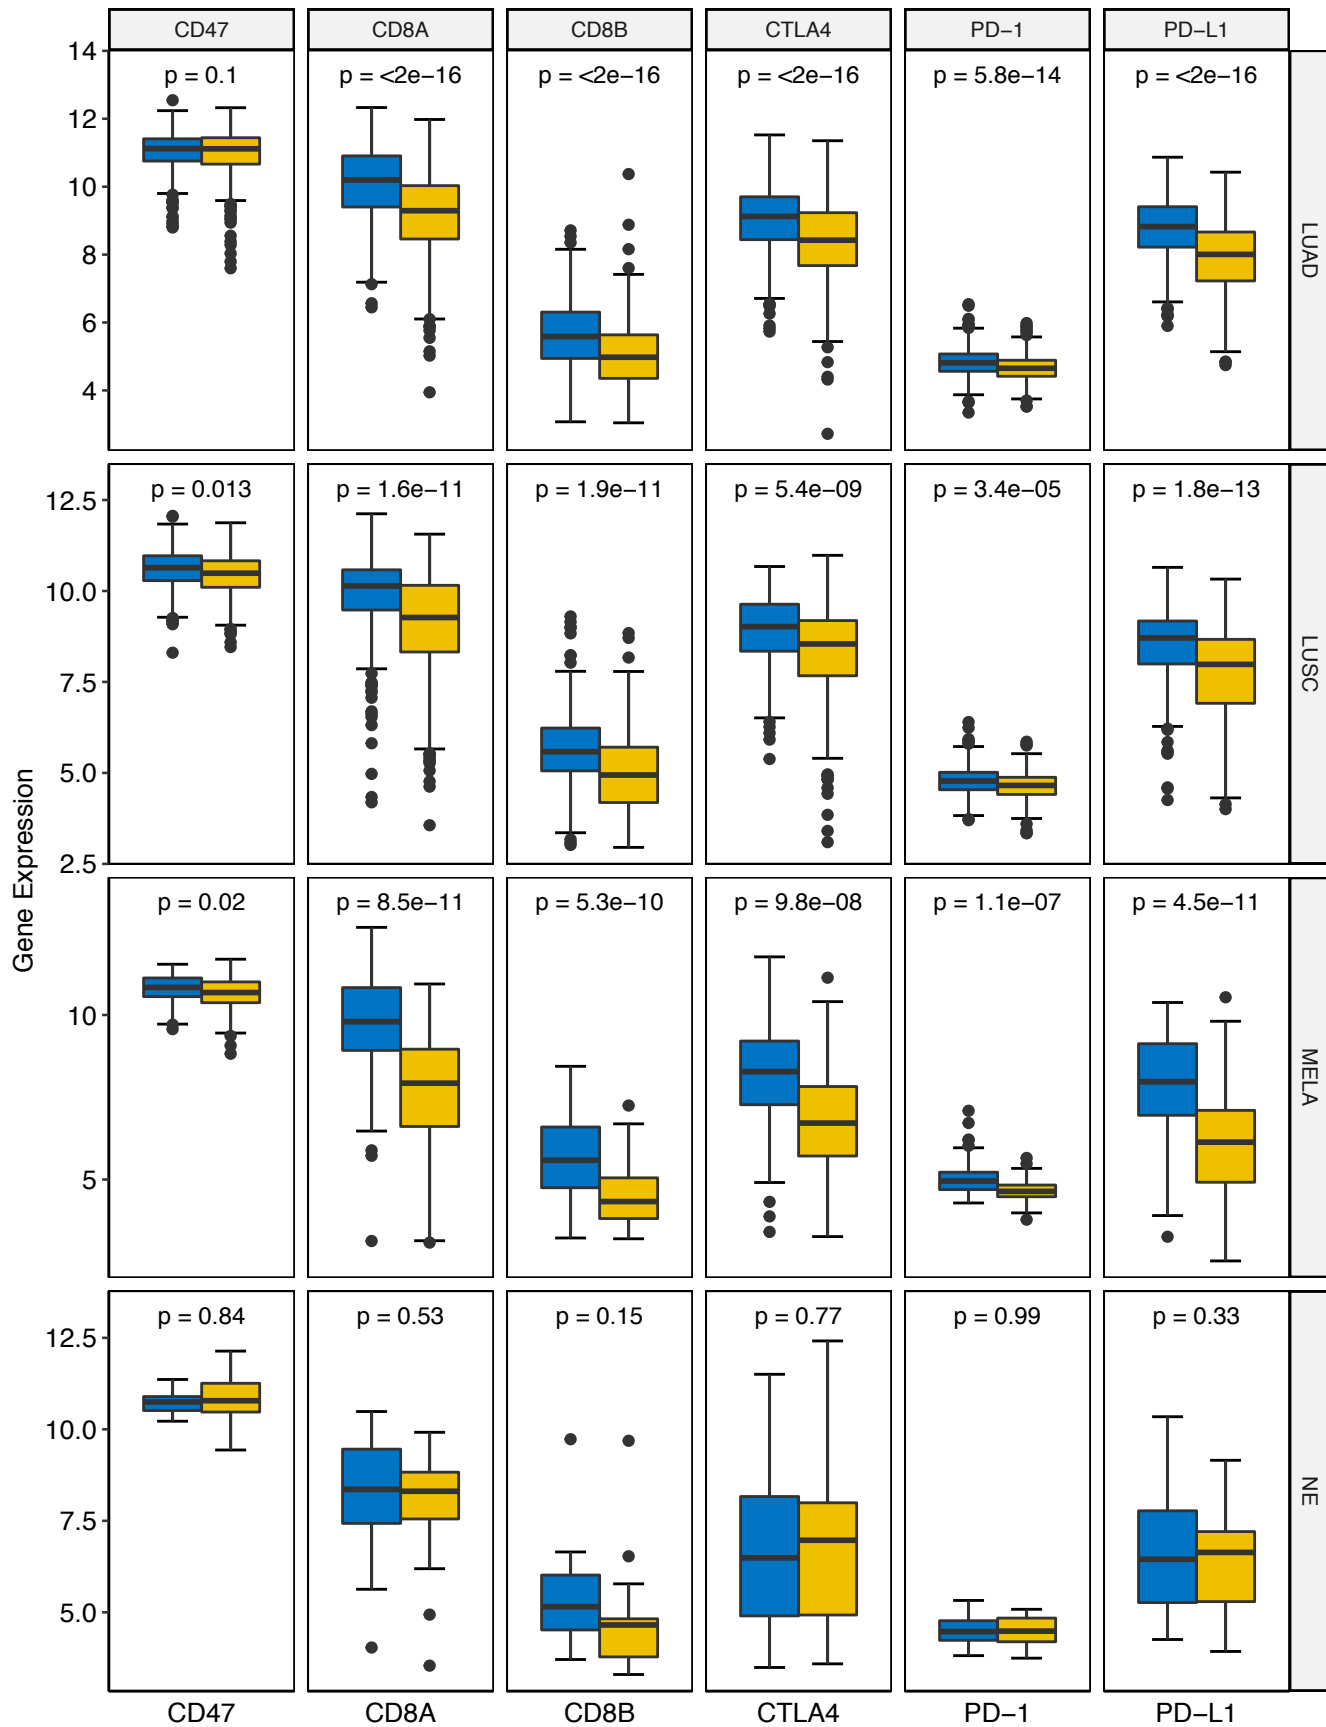

**Supplemental Figure 2**

RSI LO HI

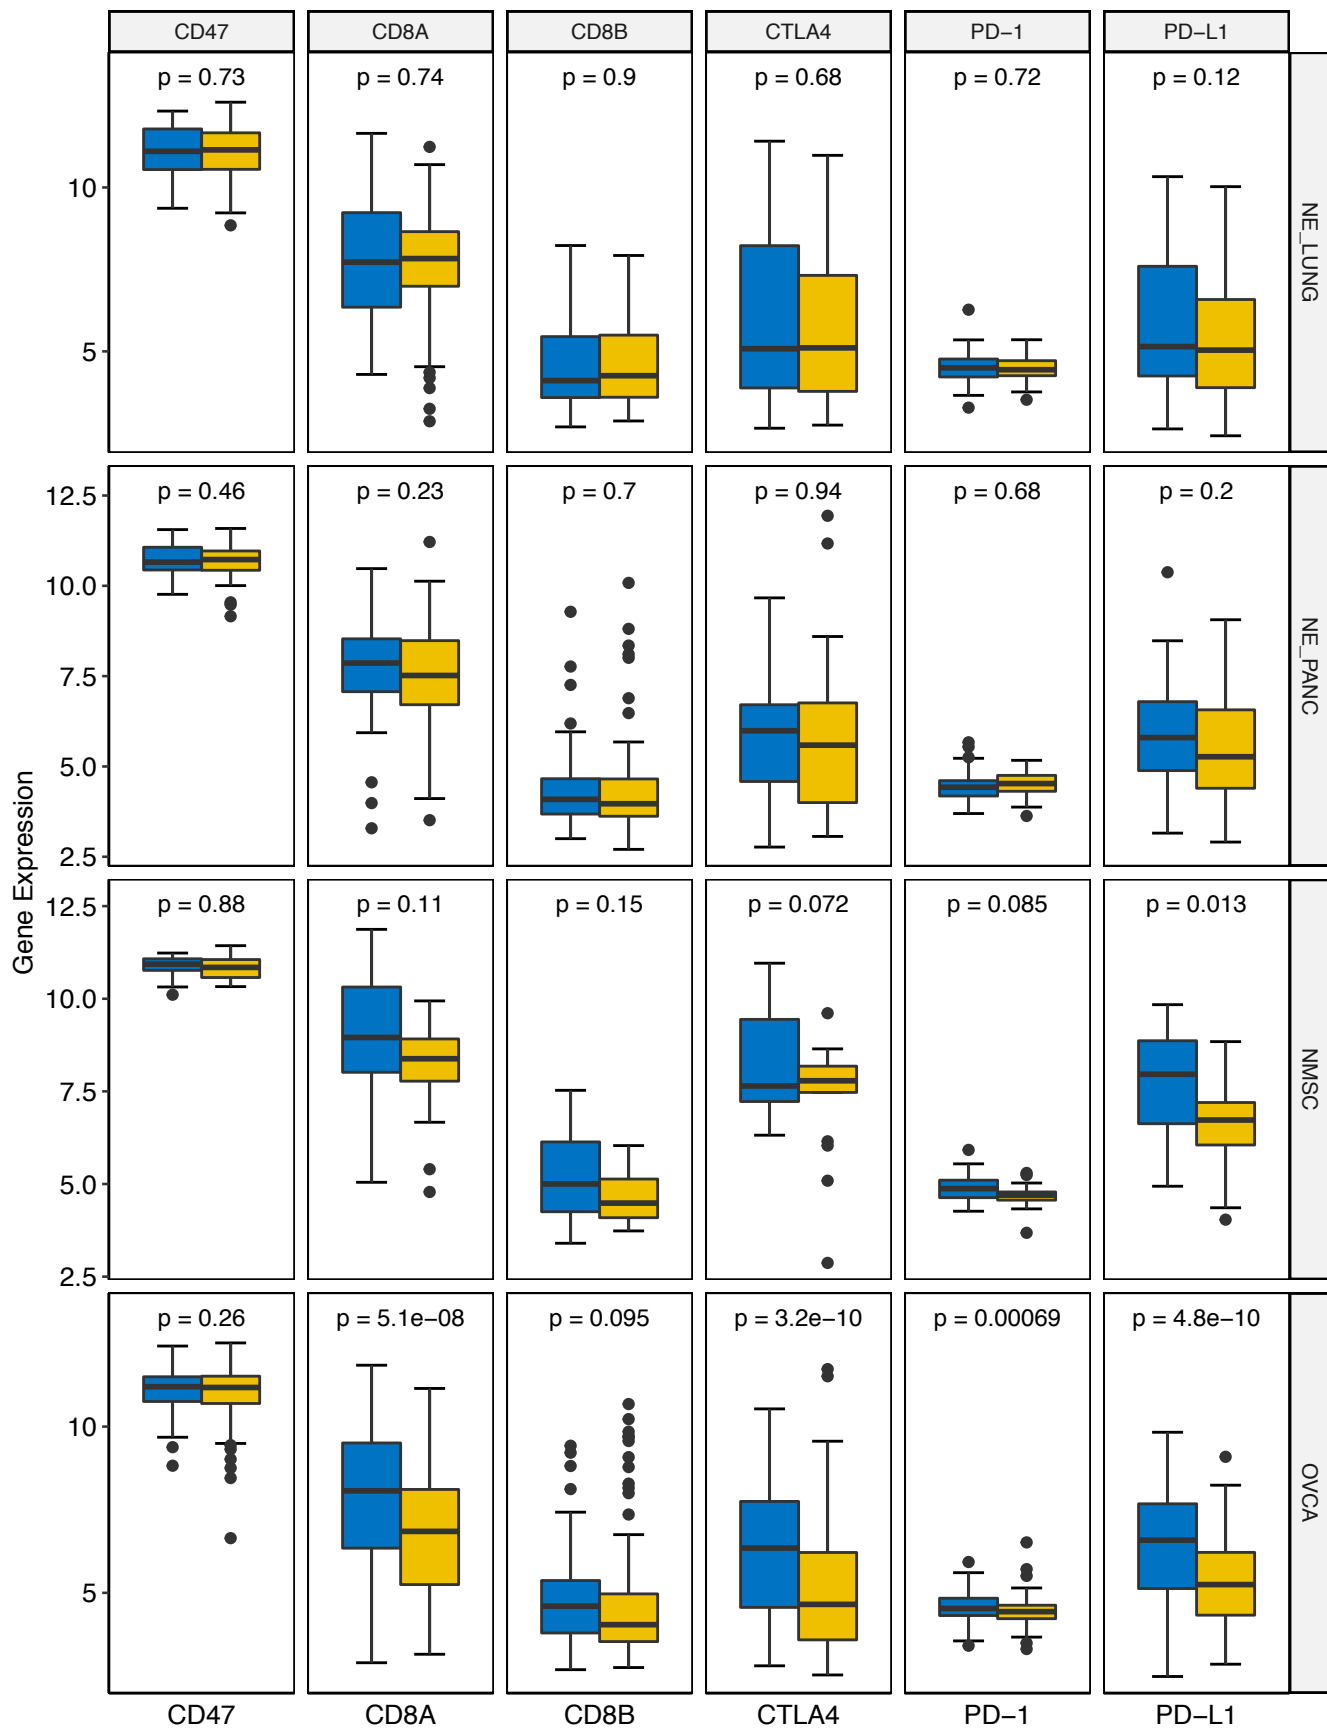

**Supplemental Figure 2**

RSI LO HI

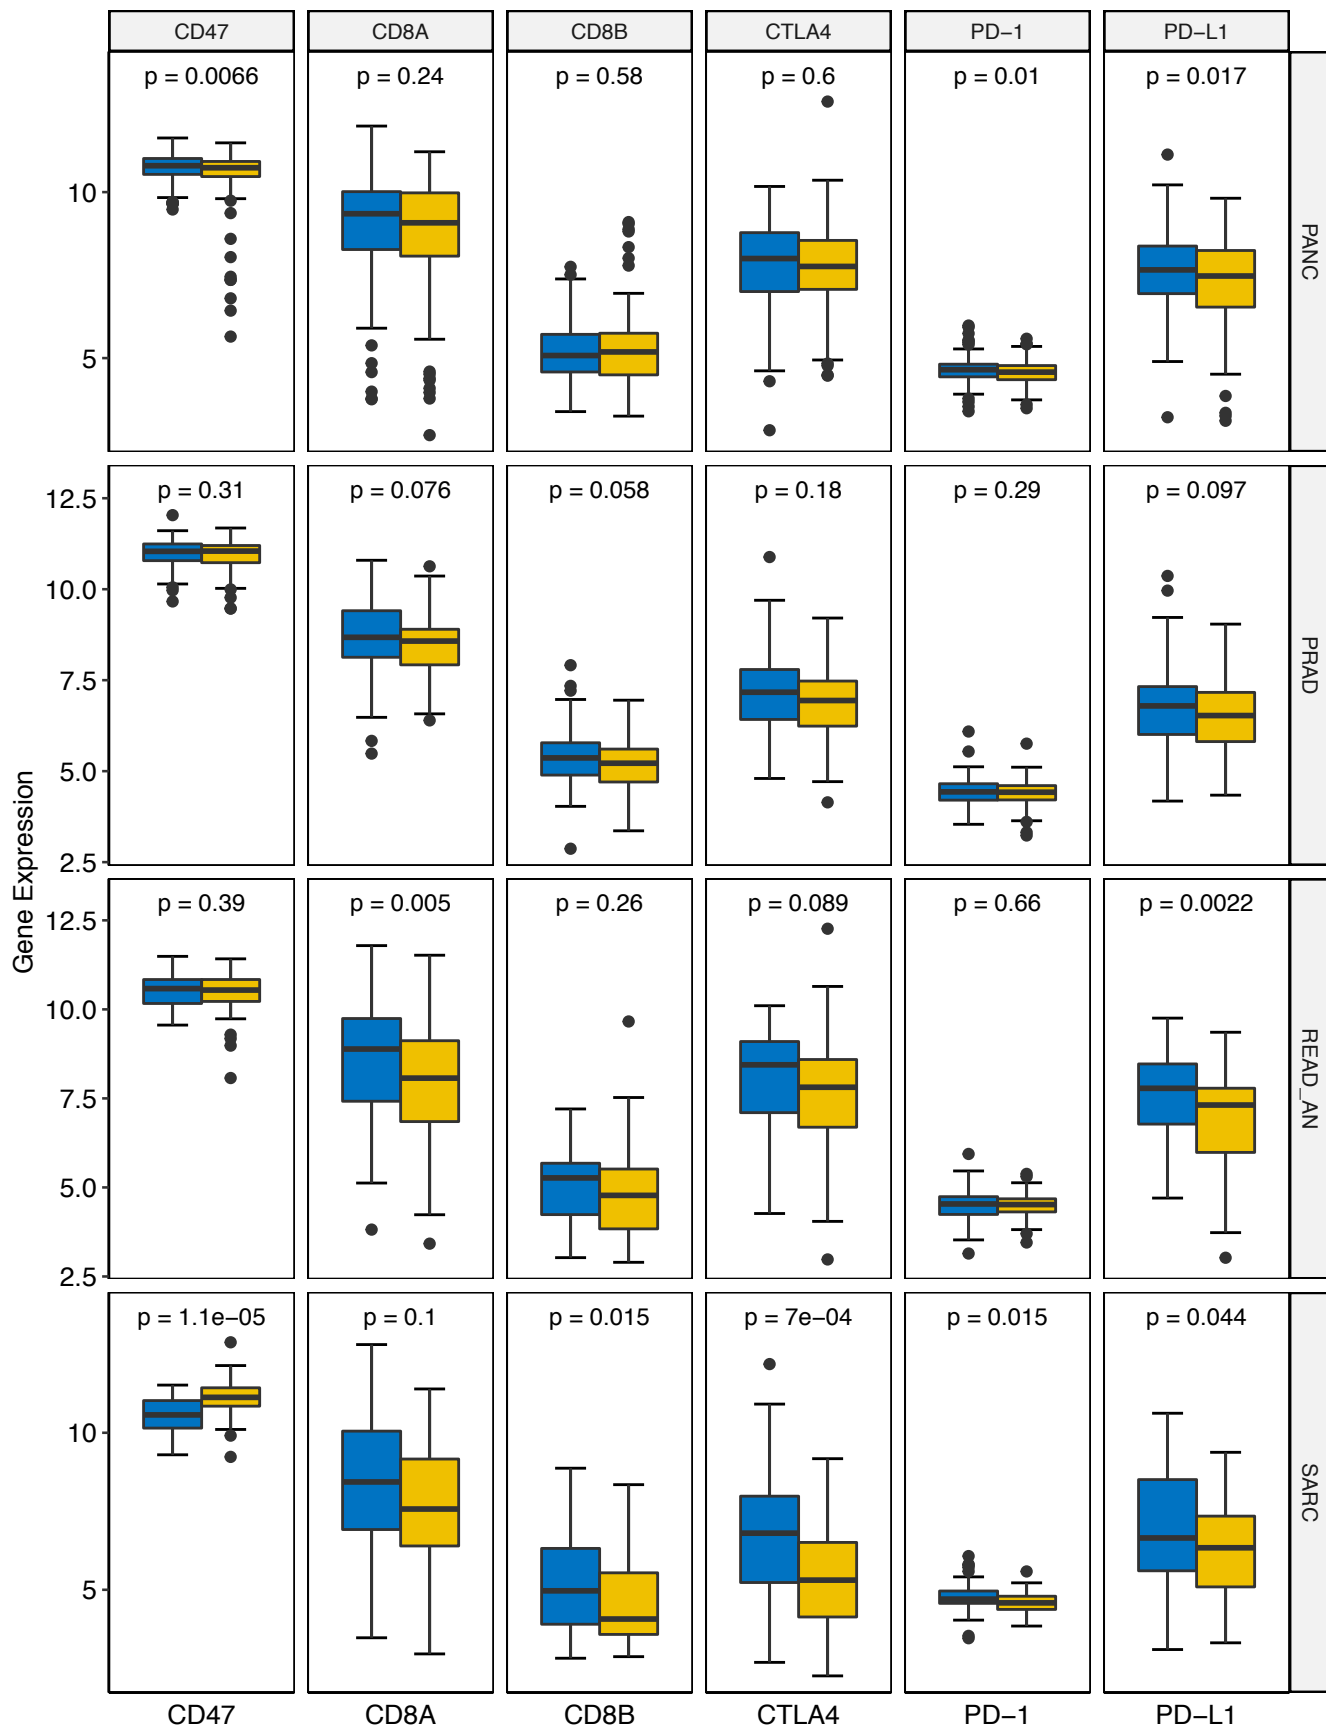

**Supplemental Figure 2**

RSI LO HI

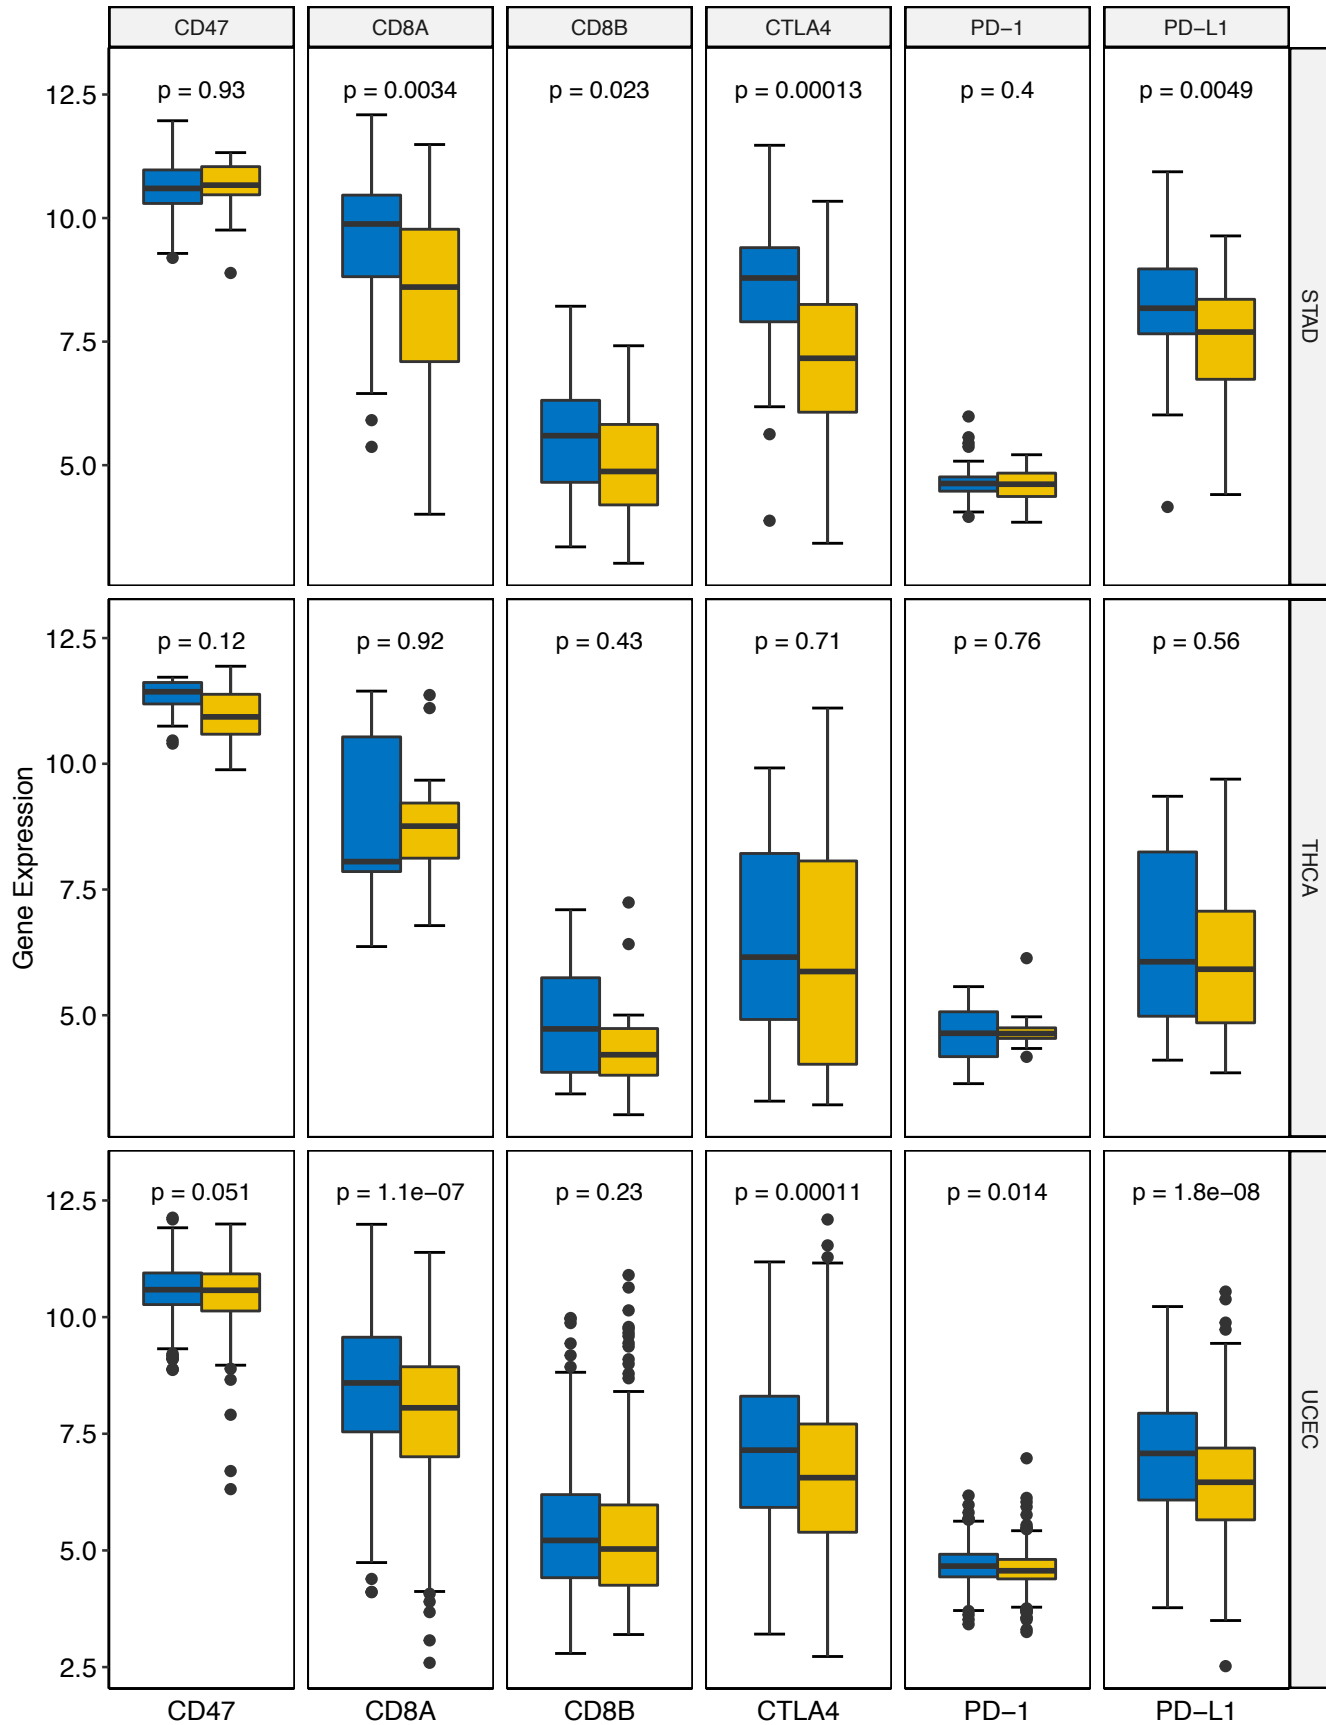

Supplement: NIHMS1800929-supplement-2.pdf [file NIHMS1800929-supplement-2.pdf]
