# Supplementary material
Source: PubMed Central journal article supplement (PMC9250625)

RSI  LO  HI

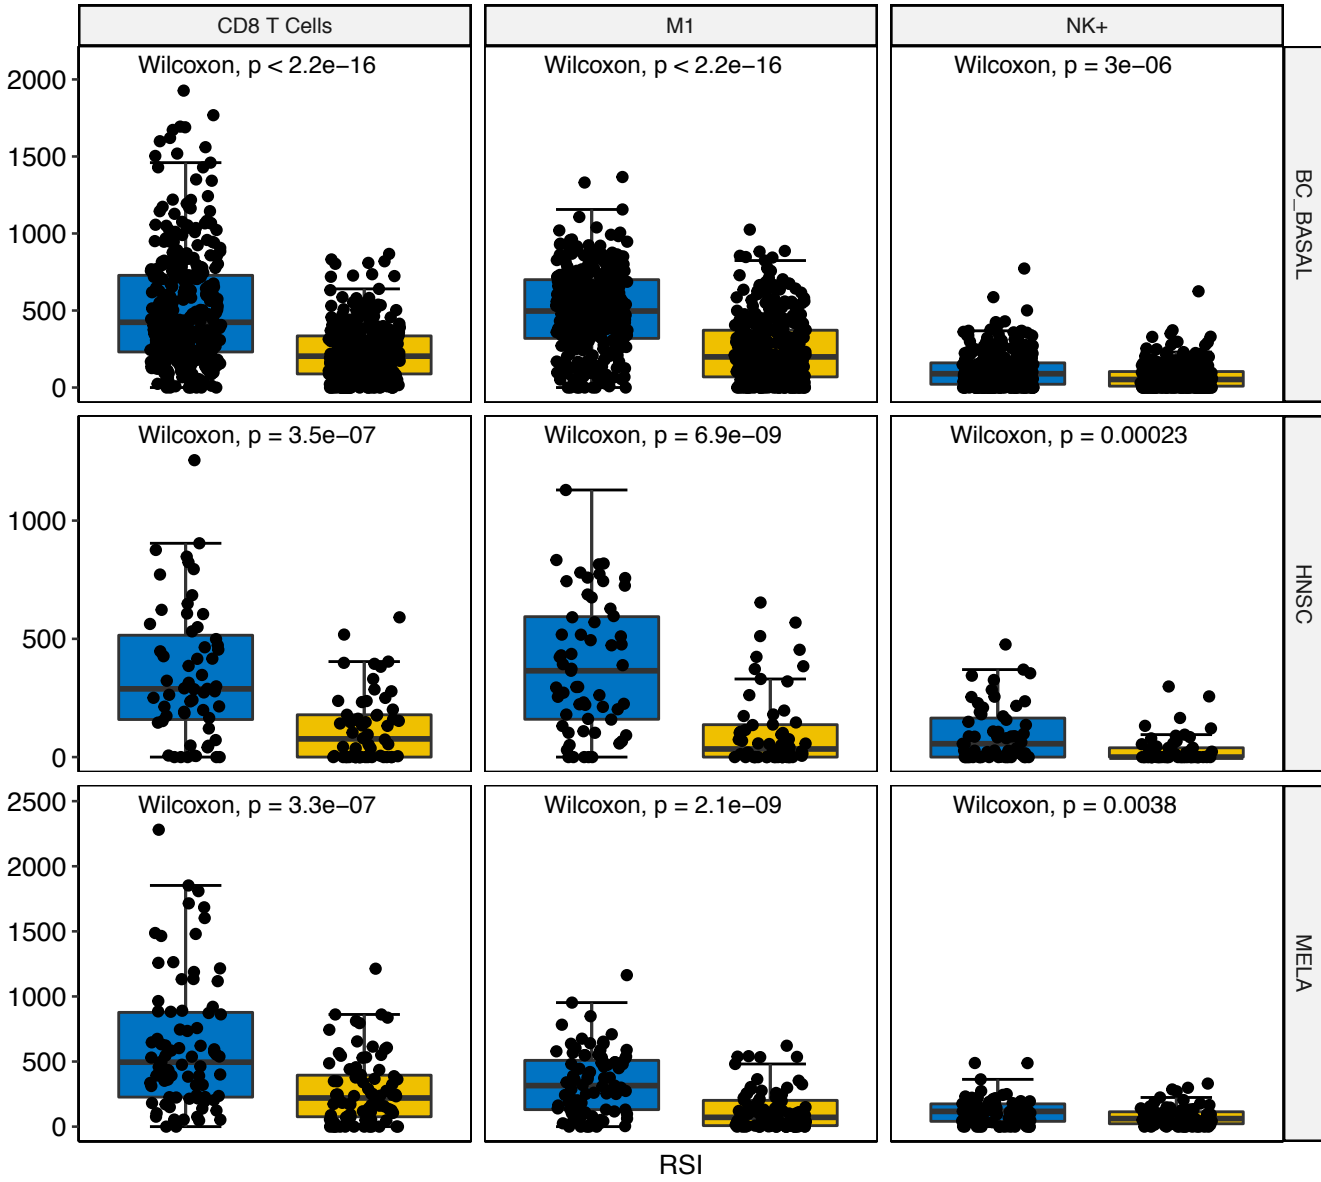

Supplement: NIHMS1800929-supplement-3.pdf [file NIHMS1800929-supplement-3.pdf]

RSI Hi/Lo  

**A** GSE1456: BRCA

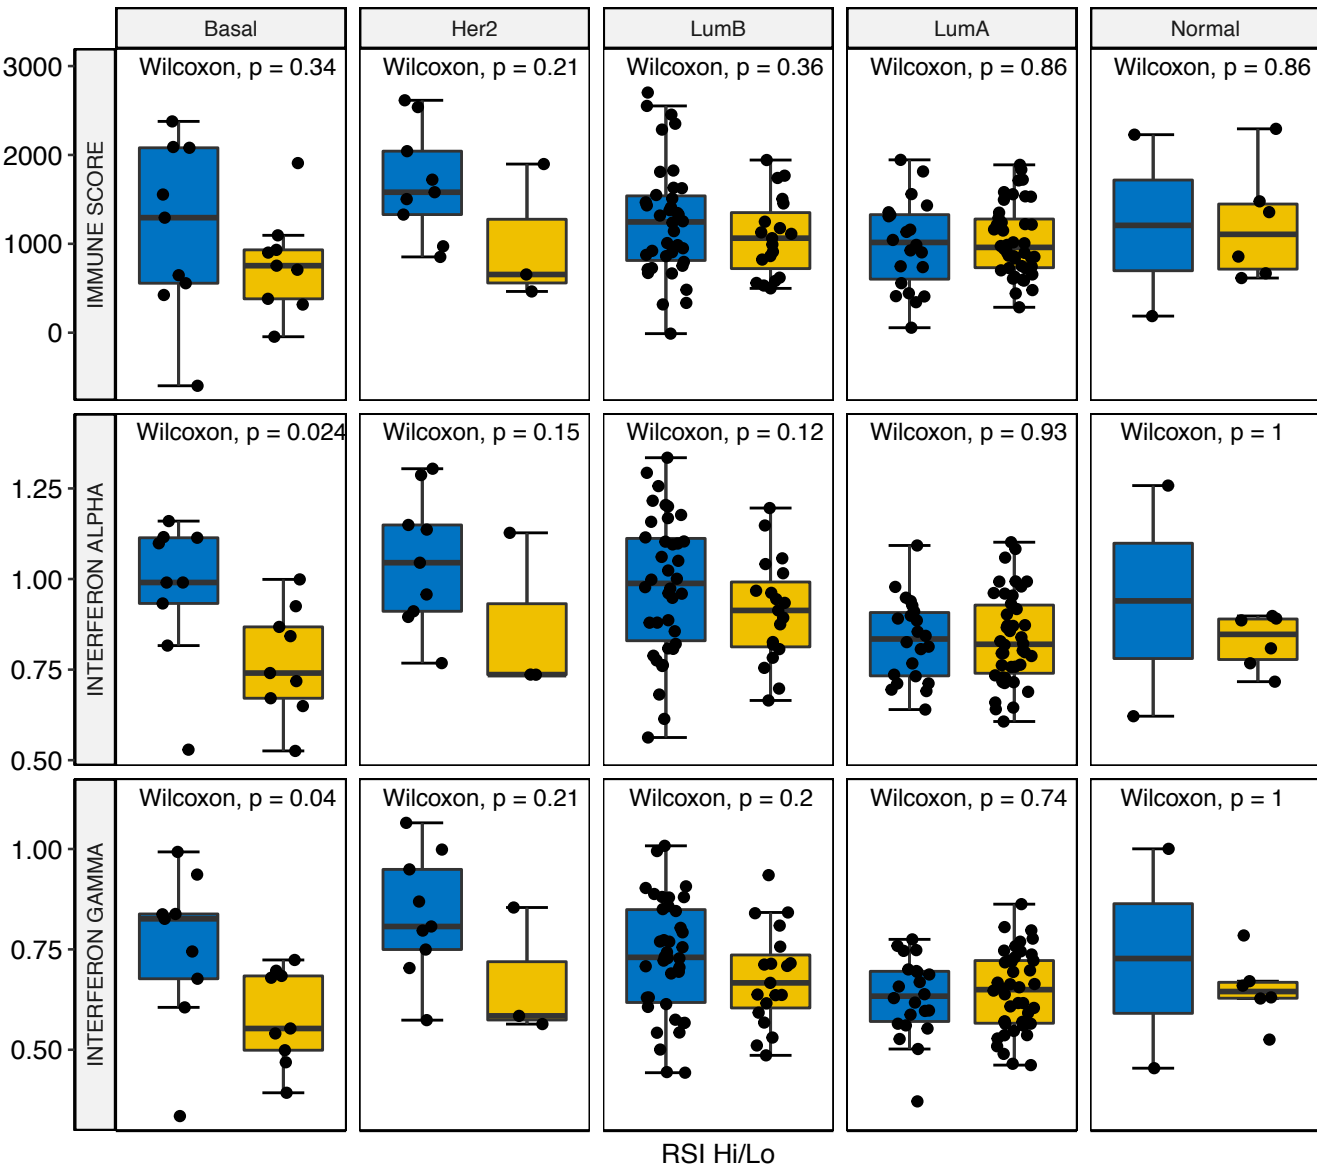

**B** GSE68465: Lung Adenocarcinoma

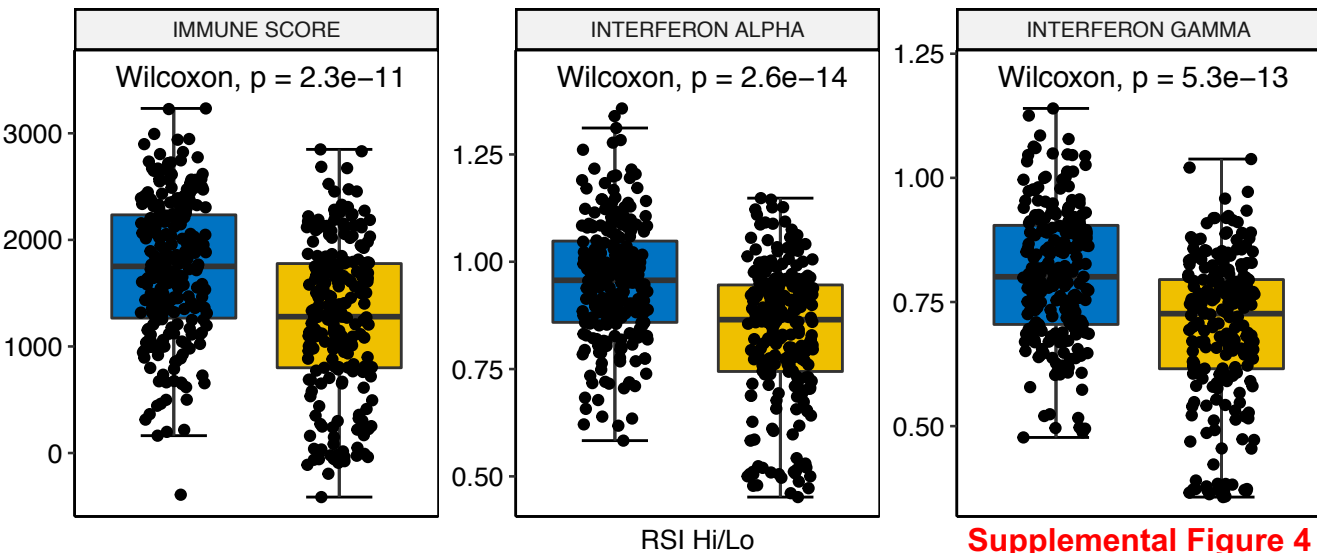

Supplement: NIHMS1800929-supplement-4.pdf [file NIHMS1800929-supplement-4.pdf]
